# Supplementary material
Source: PubMed Central journal article supplement (PMC4801479)
Supplement: NIHMS741074-supplement-Supp_1.pdf [file NIHMS741074-supplement-Supp_1.pdf]

## Appendix S1

Ratio of grape:carrot choices made in the three food preference tests by chimpanzees in the high-value reward (HR) and medium-value reward (MR) groups

| Chimpanzees (sex, age in years) | Grape:Carrot |           |           |
|---------------------------------|--------------|-----------|-----------|
|                                 | Session 1    | Session 2 | Session 3 |
| <b>HR group*</b>                |              |           |           |
| JO (F, 20)                      | 10:0         | 10:0      | 10:0      |
| GR (F, 18)                      | 10:0         | 10:0      | 10:0      |
| KR (M, 18)                      | 8:2          | 10:0      | 9:1       |
| TA (M, 18)                      | 8:2          | 9:1       | 9:1       |
| JA (M, 19)                      | 10:0         | 10:0      | 10:0      |
| <b>MR group†</b>                |              |           |           |
| SA (F, 29)                      | 9:1          | 10:0      | 9:1       |
| AH (F, 15)                      | 9:1          | 10:0      | 8:2       |
| KI (F, 12)                      | 9:1          | 10:0      | 9:1       |
| CH (F, 29)                      | 9:1          | 9:1       | 7:3       |
| HU (F, 12)                      | 8:2          | 8:2       | 10:0      |
| GA (M, 18)                      | 10:0         | 10:0      | 8:2       |
| HK (M, 27)                      | 8:2          | 7:3       | 10:0      |

\* For all test sessions, chimpanzees in the HR group showed a preference for grapes: session 1 (two-tailed Mann–Whitney  $U$  test:  $U = 2.51$ ,  $N_1 = 5$ ,  $N_2 = 5$ ,  $P = 0.01$ ); session 2 ( $U = 2.51$ ,  $N_1 = 5$ ,  $N_2 = 5$ ,  $P = 0.01$ ); session 3 ( $U = 2.51$ ,  $N_1 = 5$ ,  $N_2 = 5$ ,  $P = 0.01$ ).

† For all test sessions, chimpanzees in the MR group showed a preference for grapes: session 1 (two-tailed Mann–Whitney  $U$  test:  $U = 3.07$ ,  $N_1 = 7$ ,  $N_2 = 7$ ,  $P = 0.01$ ); session 2 ( $U = 3.07$ ,  $N_1 = 7$ ,  $N_2 = 7$ ,  $P = 0.01$ ); session 3 ( $U = 3.07$ ,  $N_1 = 7$ ,  $N_2 = 7$ ,  $P = 0.01$ ).
