# Supplementary material
Source: PubMed Central journal article supplement (PMC4801479)
Supplement: NIHMS741074-supplement-Supp_2.pdf [file NIHMS741074-supplement-Supp_2.pdf]

## Appendix S2

Proportion of candy-cane (CC) token preference choices of chimpanzees

| Chimpanzee (sex)                       | Proportion of CC tokens selected |
|----------------------------------------|----------------------------------|
| <b>‘Naïve’ controls</b>                |                                  |
| SK (M)                                 | 0.70                             |
| AD (M)                                 | 0.40                             |
| AX (M)                                 | 0.90                             |
| AA (F)                                 | 0.60                             |
| BE (F)                                 | 0.60                             |
| LE (M)                                 | 0.50                             |
| GA (M)                                 | 0.70                             |
| SO (F)                                 | 0.40                             |
| TI (F)                                 | 0.50                             |
| MU (F)                                 | 0.70                             |
| AL (M)                                 | 1.00                             |
| PE (M)                                 | 0.60                             |
| <b>Experimental (HR and MR groups)</b> |                                  |
| JO (F)                                 | 0.80                             |
| GR (F)                                 | 0.80                             |
| KR (M)                                 | 0.70                             |
| TA (M)                                 | 1.00                             |
| JA (M)                                 | 1.00                             |
| SA (F)                                 | 1.00                             |
| AH (F)                                 | 0.90                             |
| KI (F)                                 | 0.90                             |
| CH (F)                                 | 1.00                             |
| HU (F)                                 | 0.90                             |
| GA (M)                                 | 1.00                             |
| HK (M)                                 | 0.80                             |
